# Supplementary material
Source: PubMed Central journal article supplement (PMC4506491)

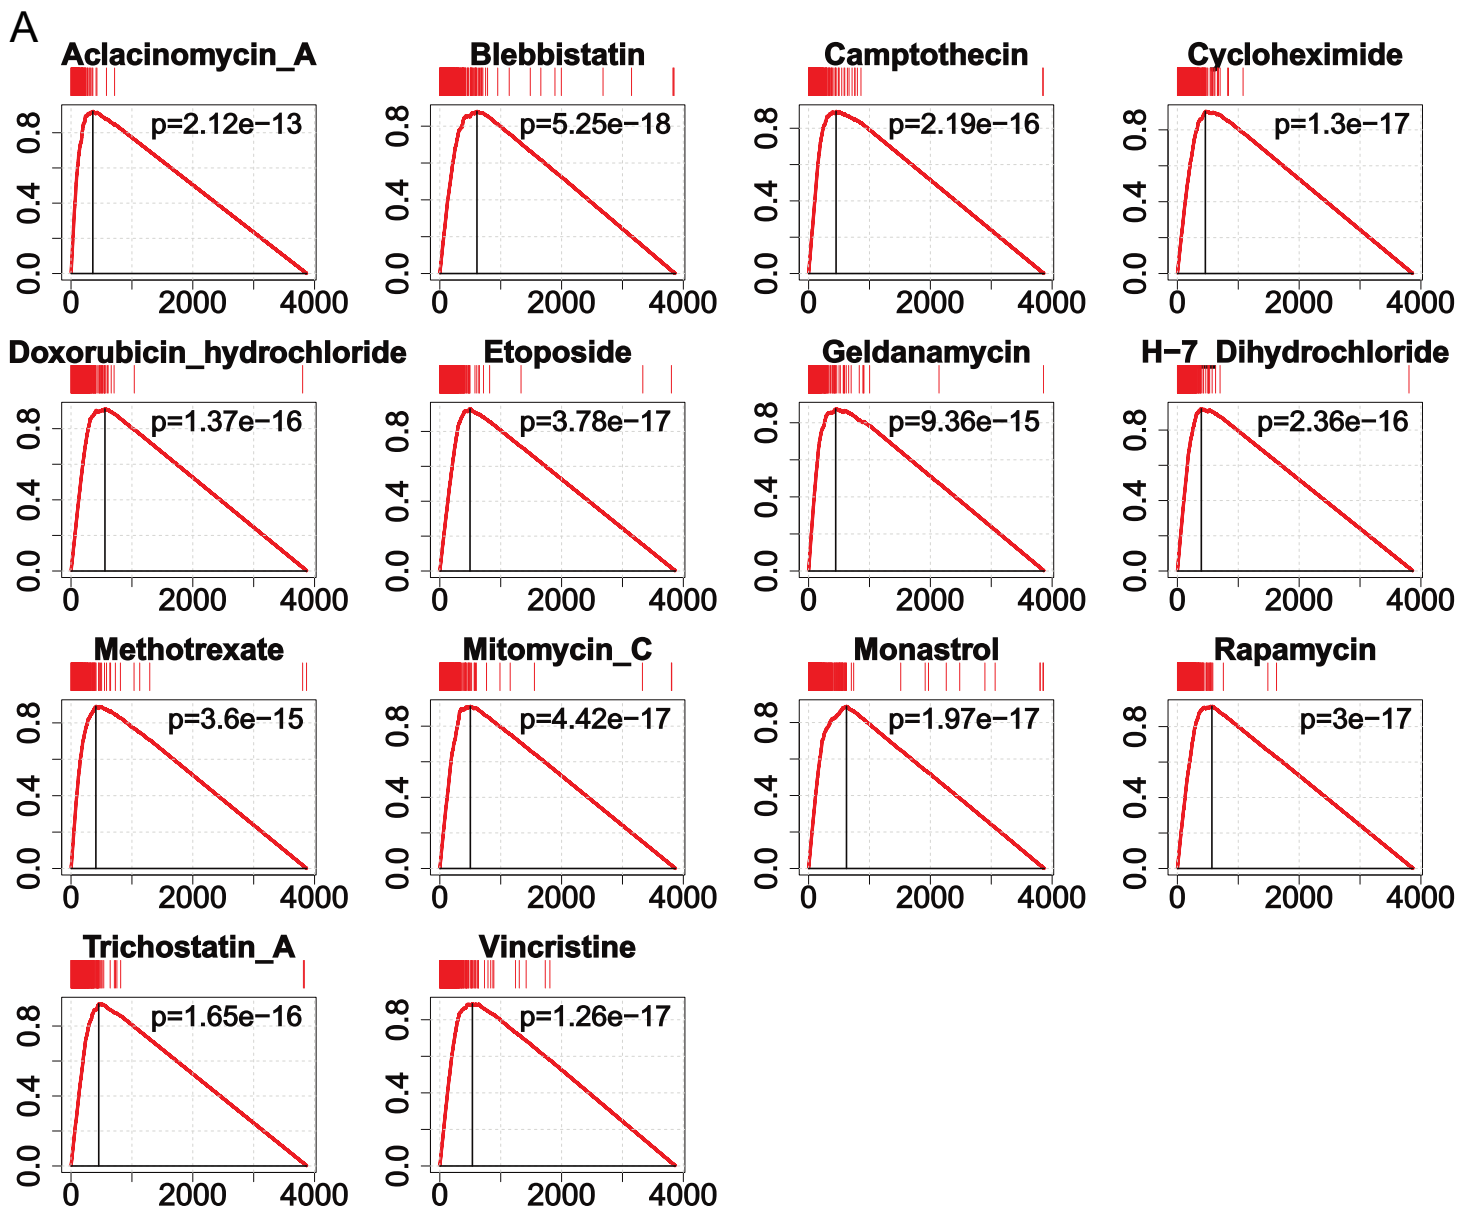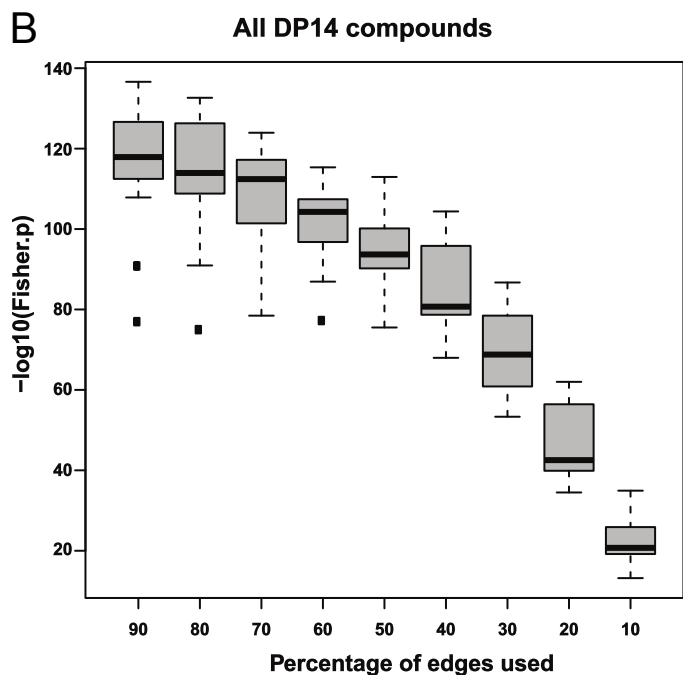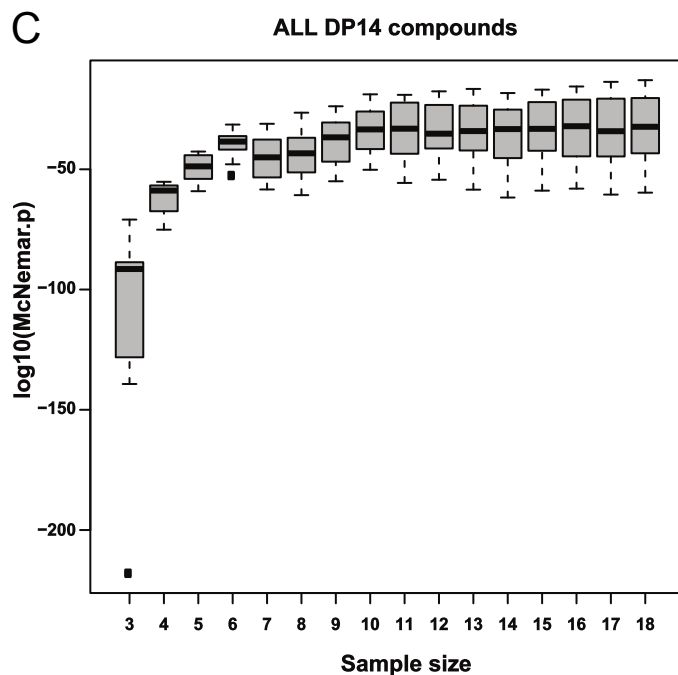

Supplement: NIHMS699713-supplement-3.pdf [file NIHMS699713-supplement-3.pdf]

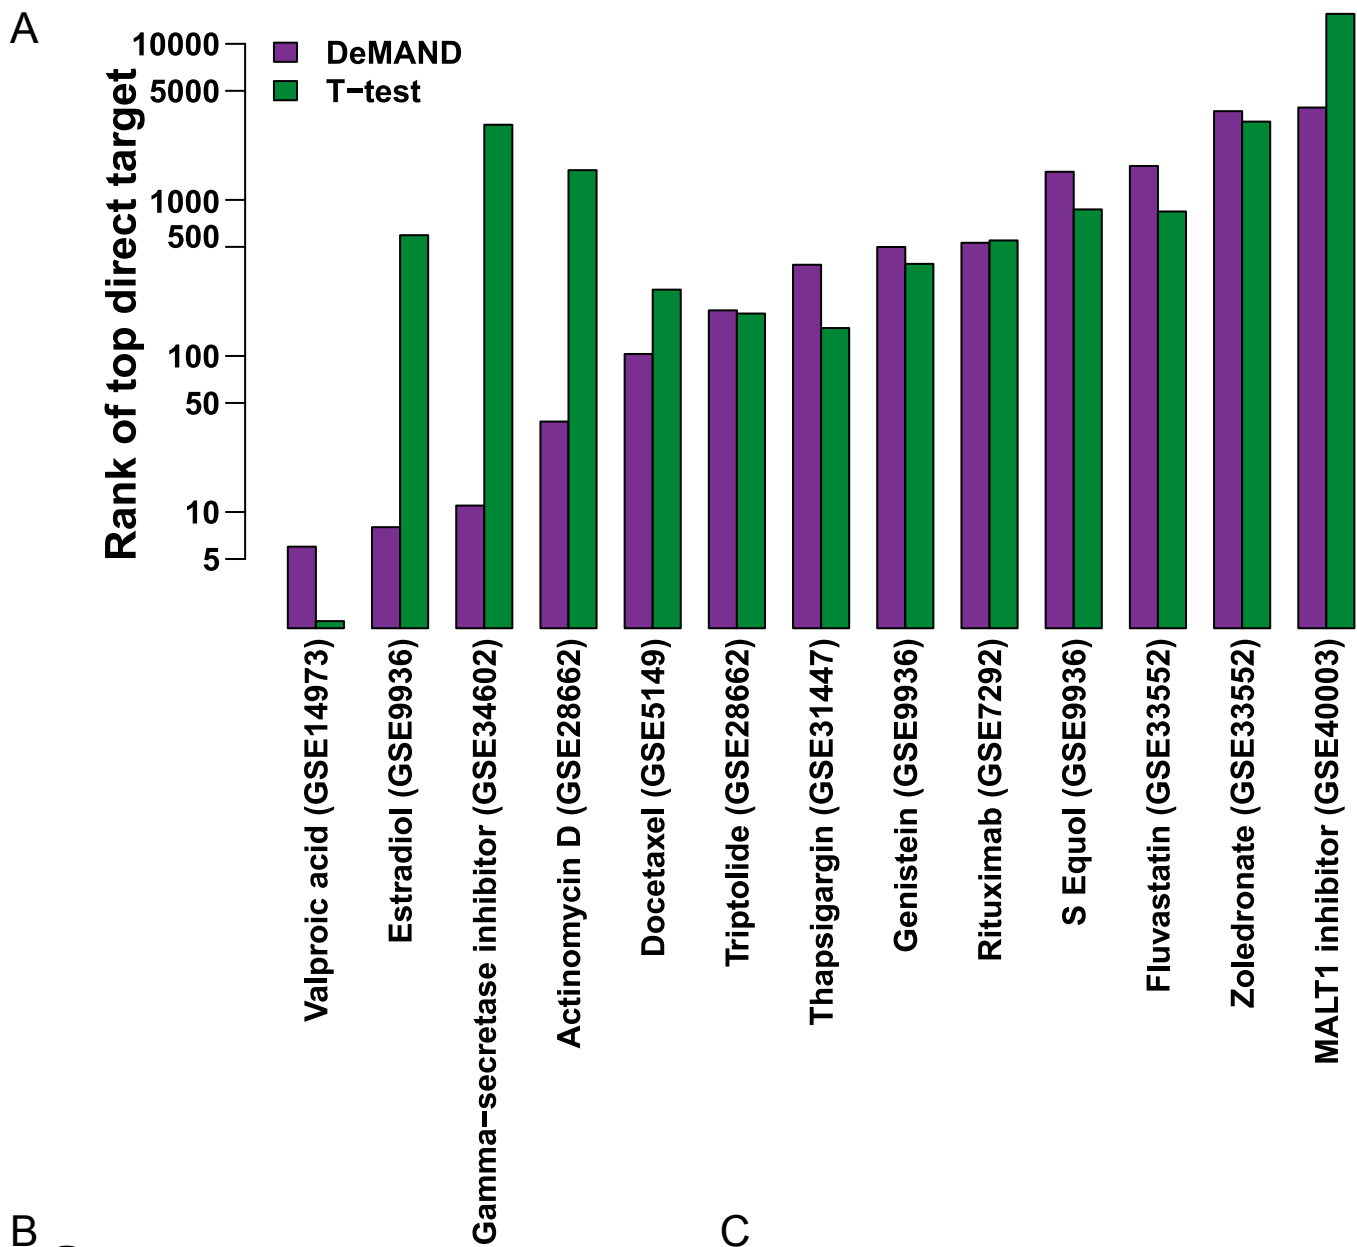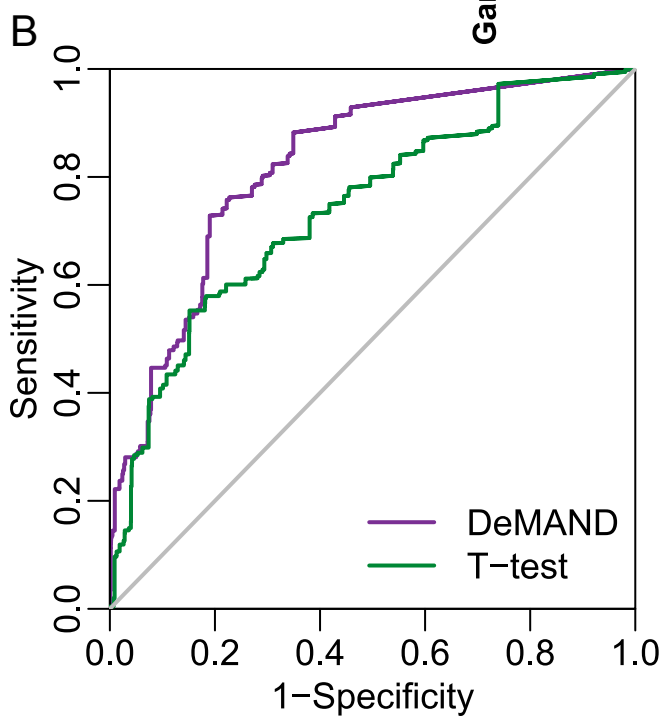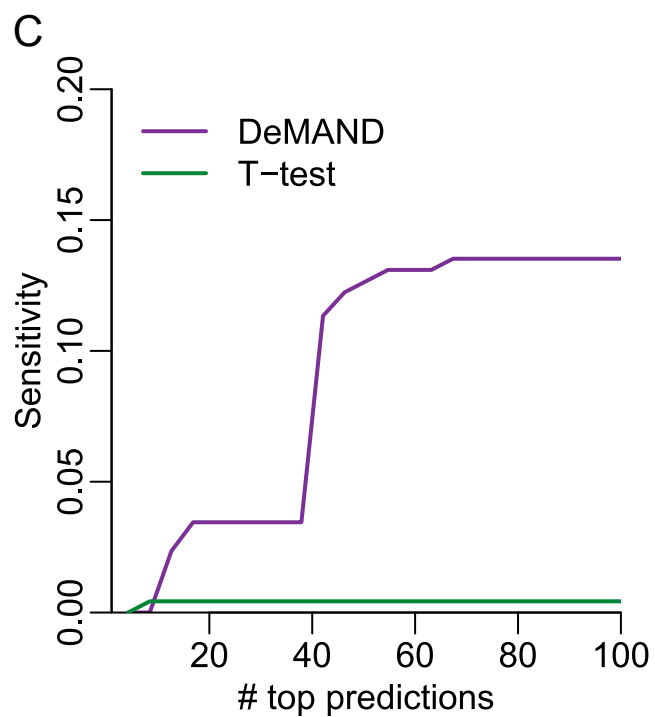

Supplement: NIHMS699713-supplement-4.pdf [file NIHMS699713-supplement-4.pdf]
